# Supplementary material for: Global funding trends for malaria research in sub-Saharan Africa: a systematic analysis
Source: PubMed Central journal article supplement (PMC5567191; doi:10.1016/s2214-109x(17)30245-0), 2017-06-28

# THE LANCET

## Global Health

### Supplementary appendix

This appendix formed part of the original submission and has been peer reviewed.  
We post it as supplied by the authors.

Supplement to: Head MG, Goss S, Gelister Y, et al. Global funding trends for malaria research in sub-Saharan Africa: a systematic analysis. *Lancet Glob Health* 2017; published online June 28. [http://dx.doi.org/10.1016/S2214-109X\(17\)30245-0](http://dx.doi.org/10.1016/S2214-109X(17)30245-0).

## **Supplementary information**

Supplementary I – Funding for malaria control data from Pigott et al (see spreadsheet included with manuscript)

Supplementary II – Funders considered for this study

Supplementary III – R&D and FMC investment and national GDP

Supplementary IV – Funding for malaria control 2006-2011, by country

Supplementary V – Parasite prevalence and funding for malaria control 2006-2011, by country

## Funders

| Included funder                                                     | Source                                       | Complementary source                         |
|---------------------------------------------------------------------|----------------------------------------------|----------------------------------------------|
| US Centre for Disease Prevention and Control (CDC)                  | Funder Website                               | -                                            |
| UK Department for International Development (DFID)                  | Funder Website                               | -                                            |
| European Commission                                                 | Spreadsheets emailed directly from EC        | Resin spreadsheet (previously collated data) |
| European & Developing Countries Clinical Trials Partnership (EDCTP) | Funder website                               |                                              |
| Bill & Melinda Gates Foundation                                     | Funder Website                               | Resin spreadsheet (previously collated data) |
| INSERM                                                              | Funder Website                               | -                                            |
| Institut Pasteur                                                    | Funder Website                               | -                                            |
| UK Medical Research Council                                         | Resin spreadsheet (previously collated data) | Dimensions                                   |
| US National Institute for Health                                    | Dimensions                                   | -                                            |
| Research Council of Norway                                          | Dimensions                                   | -                                            |
| Swedish Research Council                                            | Dimensions                                   | -                                            |
| Swiss National Science Foundation                                   | Dimensions                                   | -                                            |
| Wellcome Trust                                                      | Resin spreadsheet (previously collated data) | Dimensions                                   |
|                                                                     |                                              |                                              |
|                                                                     |                                              |                                              |
| Funders checked but not included                                    | Reason for exclusion                         |                                              |
| Canadian Institutes of Health Research                              | No data meeting inclusion criteria           |                                              |
| Centre National de la Recherche Scientifique                        | No adequate or identifiable database         |                                              |
| Chinese Ministry of Health                                          | No adequate or identifiable database         |                                              |
| German Federal Ministry of Education and Research                   | No adequate or identifiable database         |                                              |
| German Research Foundation                                          | No adequate or identifiable database         |                                              |
| Howard Hughes Medical Institute                                     | No data meeting inclusion criteria           |                                              |
| Indian Council of Medical Research (ICMR)                           | No adequate or identifiable database         |                                              |
| Innovative Medicines Initiative                                     | No adequate or identifiable database         |                                              |
| Instituto de Salud Carlos III                                       | No adequate or identifiable database         |                                              |
| Japan Science and Technology Agency                                 | No adequate or identifiable database         |                                              |
| Japan Society for Promotion of Science                              | No adequate or identifiable database         |                                              |
| Medicines for Malaria Venture                                       | No adequate or identifiable database         |                                              |
| Ministry of Health of Italy                                         | No adequate or identifiable database         |                                              |
| National Health & Medical Research Council (Australia)              | No data meeting inclusion criteria           |                                              |
| National Natural Science Foundation of China                        | No adequate or identifiable database         |                                              |
| Singapore National Medical Research Council                         | No adequate or identifiable database         |                                              |



| Country                      | GDP per capita (US\$) | FMC per GDP (US\$) | Ranking FMC | R&D per GDP (US\$) | Ranking R&D | Combined ranking score | Overall ranking |
|------------------------------|-----------------------|--------------------|-------------|--------------------|-------------|------------------------|-----------------|
| Malawi                       | 341                   | 1245500            | 1           | 210234             | 1           | 2                      | 1               |
| Tanzania                     | 909                   | 824767             | 3           | 118515             | 3           | 6                      | 2               |
| Uganda                       | 674                   | 578880             | 7           | 145127             | 2           | 9                      | 3               |
| Kenya                        | 1261                  | 493131             | 8           | 73697              | 5           | 13                     | 4=              |
| Madagascar                   | 463                   | 668632             | 5           | 34438              | 8           | 13                     | 4=              |
| Democratic Republic of Congo | 414                   | 801018             | 4           | 26421              | 11          | 15                     | 6=              |
| Ethiopia                     | 504                   | 1147014            | 2           | 24921              | 13          | 15                     | 6=              |
| Mozambique                   | 605                   | 579711             | 6           | 27029              | 10          | 16                     | 8               |
| Mali                         | 798                   | 219484             | 15          | 56538              | 7           | 22                     | 9               |
| Burkina Faso                 | 709                   | 150509             | 20          | 66754              | 6           | 26                     | 10=             |
| Ghana                        | 1827                  | 189284             | 17          | 34331              | 9           | 26                     | 10=             |
| The Gambia                   | 484                   | 85260              | 24          | 79844              | 4           | 28                     | 12=             |
| Senegal                      | 1051                  | 207356             | 16          | 26166              | 12          | 28                     | 12=             |
| Benin                        | 883                   | 230610             | 14          | 19369              | 14          | 28                     | 12=             |
| Nigeria                      | 2980                  | 263831             | 12          | 10953              | 16          | 28                     | 12=             |
| Togo                         | 589                   | 278343             | 10          | 5035               | 22          | 32                     | 16              |
| Rwanda                       | 679                   | 440401             | 9           | 4320               | 24          | 33                     | 17              |
| Zambia                       | 1840                  | 137565             | 21          | 15099              | 15          | 36                     | 18              |
| Burundi                      | 259                   | 261972             | 13          | 3787               | 25          | 38                     | 19              |
| Zimbabwe                     | 906                   | 126041             | 22          | 8533               | 17          | 39                     | 20=             |
| Niger                        | 418                   | 154878             | 18          | 5081               | 21          | 39                     | 20=             |
| Cote d'Ivoire                | 1447                  | 89156              | 23          | 6589               | 19          | 42                     | 22=             |
| Liberia                      | 453                   | 267122             | 11          | 656                | 31          | 42                     | 22=             |
| Cameroon                     | 1331                  | 75011              | 26          | 6861               | 18          | 44                     | 24              |
| Guinea                       | 522                   | 84440              | 25          | 6183               | 20          | 45                     | 25              |
| Sudan                        | 1157                  | 154220             | 19          | 1511               | 28          | 47                     | 26              |
| Eritrea                      | 543                   | 73186              | 27          | 3061               | 26          | 53                     | 27              |
| Guinea-Bissau                | 584                   | 25876              | 34          | 4746               | 23          | 57                     | 28              |
| South Africa                 | 6882                  | 40028              | 32          | 2165               | 27          | 59                     | 29              |

|                          |       |       |    |      |    |    |     |
|--------------------------|-------|-------|----|------|----|----|-----|
| Somalia                  | 521   | 50764 | 30 | 1160 | 30 | 60 | 30  |
| Angola                   | 5327  | 56499 | 28 | 22   | 36 | 64 | 31  |
| Sierra Leone             | 803   | 52479 | 29 | 0    | 38 | 67 | 32  |
| Central African Republic | 317   | 43551 | 31 | 0    | 38 | 69 | 33  |
| Comoros                  | 797   | 9105  | 37 | 282  | 33 | 70 | 34= |
| Namibia                  | 5421  | 13795 | 35 | 54   | 35 | 70 | 34= |
| Gabon                    | 10659 | 1977  | 42 | 1209 | 29 | 71 | 36= |
| Chad                     | 985   | 38496 | 33 | 0    | 38 | 71 | 36= |
| Swaziland                | 3648  | 3499  | 41 | 288  | 32 | 73 | 38  |
| Mauritania               | 1458  | 10545 | 36 | 0    | 38 | 74 | 39  |
| Sao Tome and Principe    | 1676  | 4732  | 39 | 17   | 37 | 76 | 40= |
| Congo                    | 3205  | 7410  | 38 | 0    | 38 | 76 | 40= |
| Equatorial Guinea        | 21498 | 1585  | 43 | 89   | 34 | 77 | 42  |
| Djibouti                 | 1683  | 4018  | 40 | 0    | 38 | 78 | 43  |
| Botswana                 | 6807  | 862   | 44 | 0    | 38 | 82 | 44  |
| Cape Verde               | 3623  | 560   | 45 | 0    | 38 | 83 | 45  |

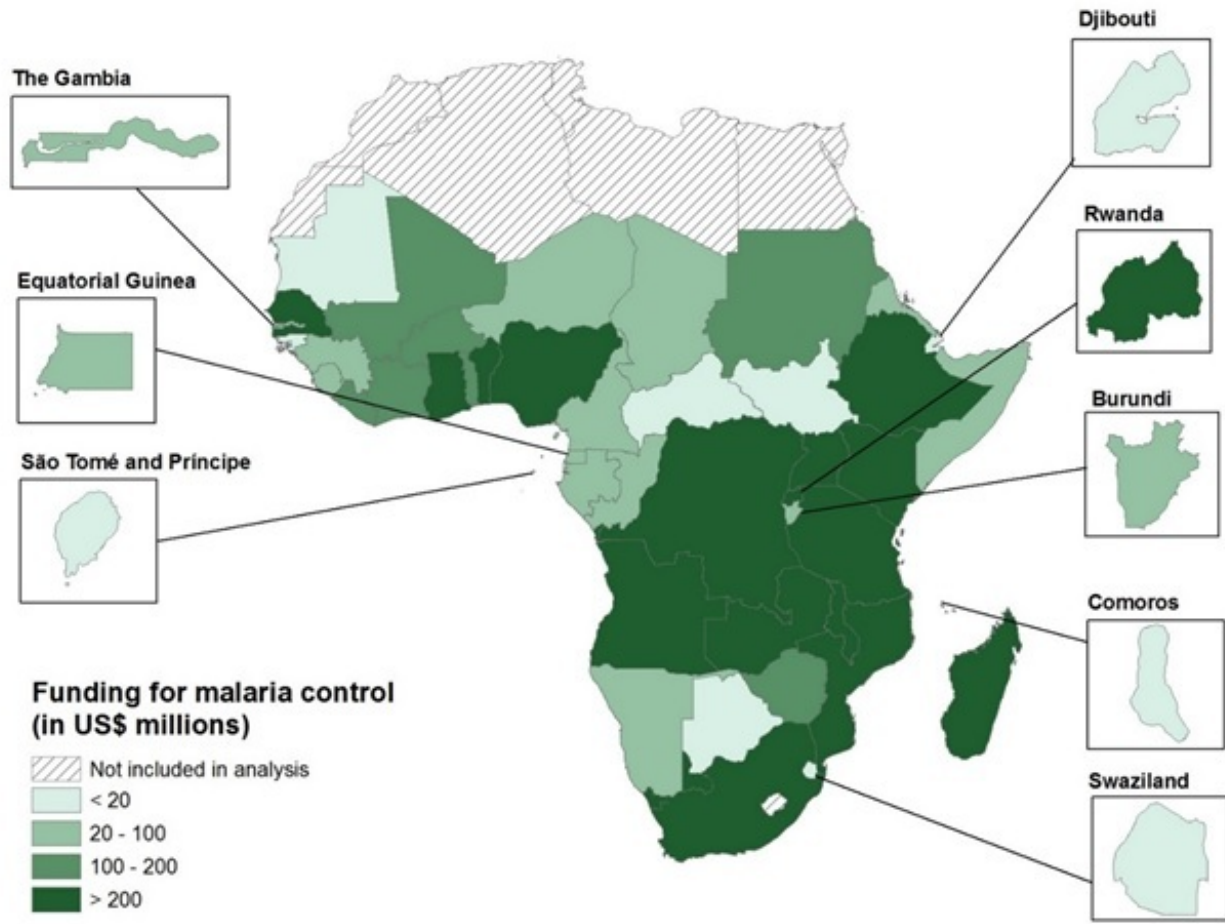

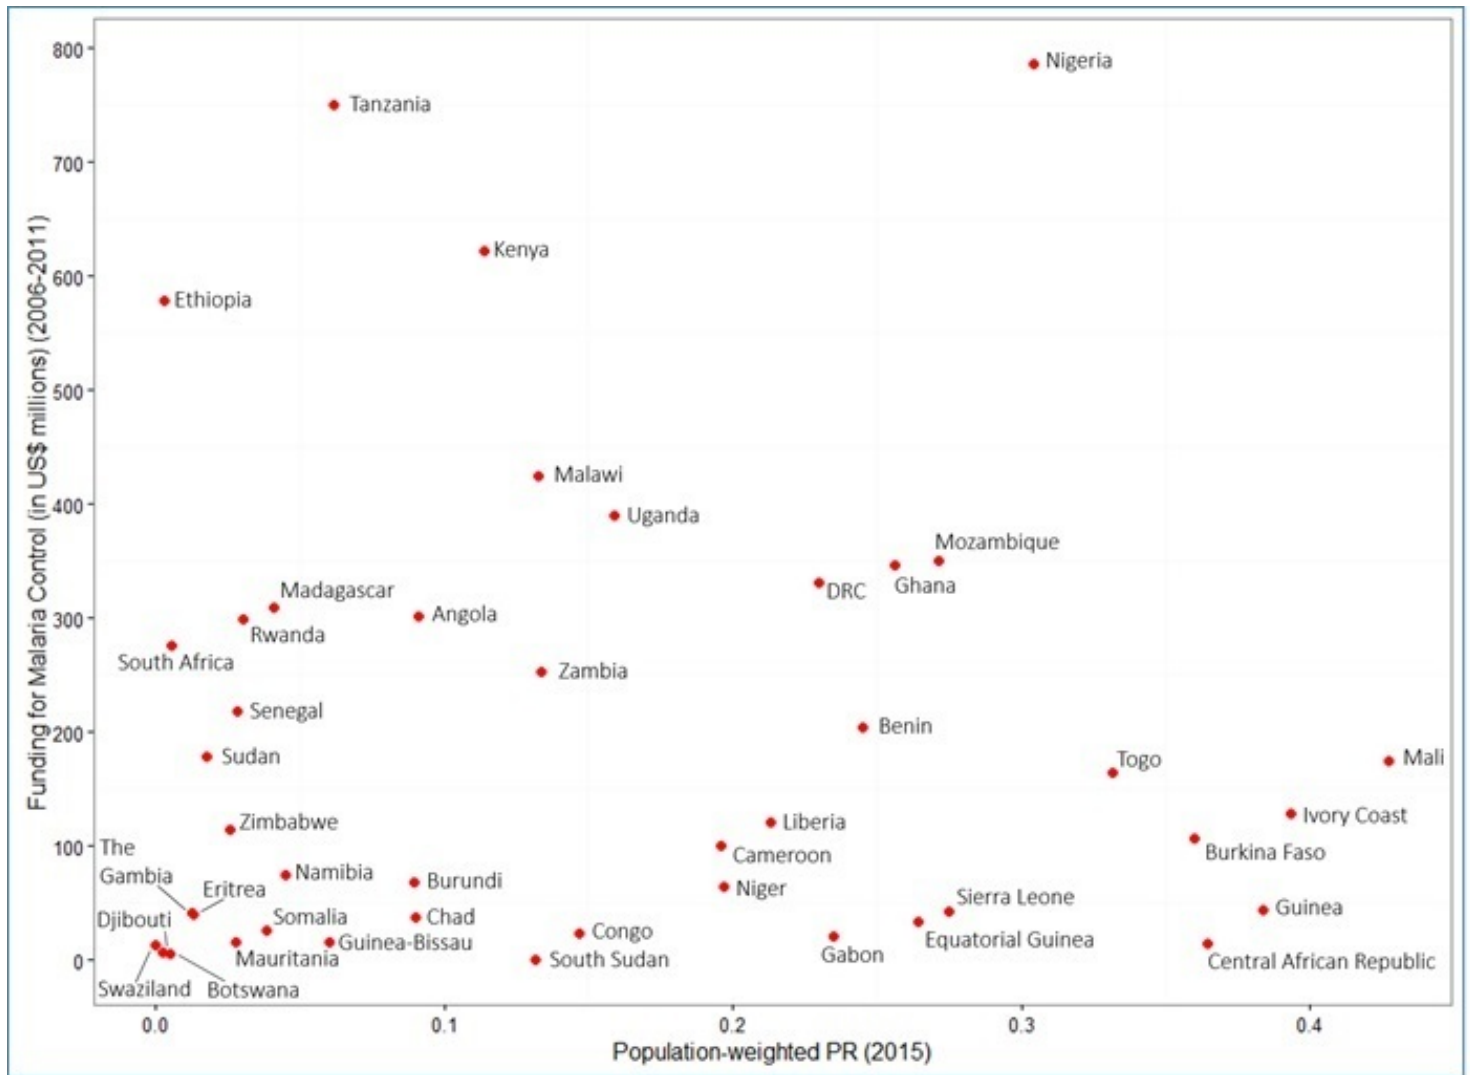

Supplement: mmc1.pdf [file mmc1.pdf]
